# Supplementary material for: Ag+, Fe3+and Zn2+-intercalated cadmium(ii)-metal–organic frameworks for enhanced daylight photocatalysis
Source: Royal Society of Chemistry journal article supplement (doi:10.1039/c7ra10034e), 2017-01-01
Supplement: c7ra10034e1.pdf [file c7ra10034e1.pdf]

## **Ag<sup>+</sup>, Fe<sup>3+</sup> and Zn<sup>2+</sup> Intercalated Cadmium (II)-Metal-Organic Frameworks for enhanced Day Light Photocatalysis**

Nur Atiqah Surib<sup>a</sup>, Lan Ching Sim<sup>b</sup>, Kah Hon Leong<sup>b\*</sup>, Aneek Kuila<sup>c</sup>, Pichiah Saravanan<sup>a,c\*</sup>,  
Kong Mun Lo<sup>d</sup>, Shaliza Ibrahim<sup>a\*</sup>, Detlef Bahnemann<sup>e</sup>, Min Jang<sup>f</sup>

<sup>a</sup> Environmental Engineering Laboratory, Department of Civil Engineering, University of Malaya, 50603 Kuala Lumpur, Malaysia

<sup>b</sup> Department of Environmental Engineering, Faculty of Engineering and Green Technology, Universiti Tunku Abdul Rahman, Jalan Universiti, Bandar Barat, 31900 Kampar, Perak, Malaysia

<sup>c</sup> Environmental Nanotechnology Laboratory, Department of Environmental Science and Engineering, Indian Institute of Technology Dhanbad-826004 Jharkhand, India

<sup>d</sup> Department of Chemistry, Faculty of Science, University of Malaya, 50603 Kuala Lumpur, Malaysia

<sup>e</sup> Institut fuer Technische Chemie, Leibniz Universität Hannover, Callinstrasse 3, D-30167 Hannover, Germany

<sup>f</sup> Department of Environmental Engineering, Kwangwoon University, 20 Kawangoon-ro Nowon-gu, Seoul 01897, Korea

---

\* Corresponding author

Email: [khleong@utar.edu.my](mailto:khleong@utar.edu.my)

Email: [pichiahsaravanan@gmail.com](mailto:pichiahsaravanan@gmail.com)

Email: [shaliza@um.edu.my](mailto:shaliza@um.edu.my)

**Table S1** Crystal data for Cd-MOF

|                                                   | Cd-MOF                                            |
|---------------------------------------------------|---------------------------------------------------|
| <b>Empirical formula</b>                          | H <sub>7</sub> O <sub>7</sub> CdC <sub>5</sub>    |
| <b>Formula weight</b>                             | 291.51                                            |
| <b>Temperature/K</b>                              | 100.01(10)                                        |
| <b>Crystal system</b>                             | triclinic                                         |
| <b>Space group</b>                                | P1                                                |
| <b>a/Å</b>                                        | 5.5108(7)                                         |
| <b>b/Å</b>                                        | 7.8194(10)                                        |
| <b>c/Å</b>                                        | 9.6854(11)                                        |
| <b>α/°</b>                                        | 109.785(11)                                       |
| <b>β/°</b>                                        | 104.283(11)                                       |
| <b>γ/°</b>                                        | 98.964(10)                                        |
| <b>Volume/Å<sup>3</sup></b>                       | 367.24(8)                                         |
| <b>Z</b>                                          | 2                                                 |
| <b>ρ<sub>calc</sub>/mg/mm<sup>3</sup></b>         | 2.636                                             |
| <b>m/mm<sup>-1</sup></b>                          | 2.979                                             |
| <b>F(000)</b>                                     | 282                                               |
| <b>2θ range for data collection</b>               | 5.74 to 55°                                       |
| <b>Index ranges</b>                               | -7 ≤ h ≤ 7, -10 ≤ k ≤ 10, -12 ≤ l ≤ 10            |
| <b>Reflections collected</b>                      | 2913                                              |
| <b>Independent reflections</b>                    | 1682[R(int) = 0.0331]                             |
| <b>Data/restraints/parameters</b>                 | 1682/0/122                                        |
| <b>Goodness-of-fit on F<sup>2</sup></b>           | 1.206                                             |
| <b>Final R indexes [I ≥ 2σ (I)]</b>               | R <sub>1</sub> = 0.0304, wR <sub>2</sub> = 0.0785 |
| <b>Final R indexes [all data]</b>                 | R <sub>1</sub> = 0.0317, wR <sub>2</sub> = 0.0794 |
| <b>Largest diff. peak/hole / e Å<sup>-3</sup></b> | 0.72/-1.24                                        |

**Table S2** Selected bond and angles in Cd-MOF

| Bond                           | Distance (Å) | Bond                          | Distance (Å) |
|--------------------------------|--------------|-------------------------------|--------------|
| Cd(1)-O(1)                     | 2.324(3)     | O(3)-C(5 <sup>2</sup> )       | 1.275(6)     |
| Cd(1)-O(1 <sup>1</sup> )       | 2.340(3)     | O(4)-C(5)                     | 1.251(5)     |
| Cd(1)-O(3)                     | 2.236(3)     | C(1)-C(2)                     | 1.410(6)     |
| Cd(1)-O(5)                     | 2.371(4)     | C(1)-C(3)                     | 1.388(6)     |
| Cd(1)-O(6)                     | 2.280(3)     | C(1)-C(4)                     | 1.508(6)     |
| Cd(1)-O(7)                     | 2.346(3)     | C(2)-C(3 <sup>3</sup> )       | 1.399(6)     |
| O(1)-Cd(1 <sup>1</sup> )       | 2.340(3)     | C(2)-C(5)                     | 1.494(6)     |
| O(1)-C(4)                      | 1.271(5)     | C(3)-C(2 <sup>3</sup> )       | 1.399(6)     |
| O(2)-C(4)                      | 1.253(5)     | C(5)-O(3 <sup>2</sup> )       | 1.275(6)     |
| Angle                          | (°)          | Angle                         | (°)          |
| O(1)-Cd(1)-O(1 <sup>1</sup> )  | 73.94(12)    | C(4)-O(1)-Cd(1 <sup>1</sup> ) | 136.4(3)     |
| O(1)-Cd(1)-O(5)                | 76.18(13)    | C(4)-O(1)-Cd(1)               | 109.3(3)     |
| O(1 <sup>1</sup> )-Cd(1)-O(5)  | 86.59(14)    | C(5 <sup>2</sup> )-O(3)-Cd(1) | 112.0(3)     |
| O(1 <sup>1</sup> )-Cd(1)-O(7)  | 171.36(11)   | C(2)-C(1)-C(4)                | 123.8(4)     |
| O(1)-Cd(1)-O(7)                | 112.80(11)   | C(3)-C(1)-(C2)                | 119.5(4)     |
| O(3)-Cd(1)-O(1)                | 87.11(11)    | C(3)-C(1)-C(4)                | 116.7(4)     |
| O(3)-Cd(1)-O(1 <sup>1</sup> )  | 84.52(12)    | C(1)-C(2)-C(5)                | 121.8(4)     |
| O(3)-Cd(1)-O(5)                | 162.71(14)   | C(3 <sup>3</sup> )-C(2)-C(1)  | 118.5(4)     |
| O(3)-Cd(1)-O(6)                | 114.07(13)   | C(3 <sup>3</sup> )-C(2)-C(5)  | 119.7(4)     |
| O(3)-Cd(1)-O(7)                | 90.33(12)    | C(1)-C(3)-C(2 <sup>3</sup> )  | 122.0(4)     |
| O(6)-Cd(1)-O(1)                | 151.68(12)   | O(1)-C(4)-C(1)                | 119.6(4)     |
| O(6)-Cd(1)-O(1 <sup>1</sup> )  | 88.96(11)    | O(2)-C(4)-O(1)                | 121.9(4)     |
| O(6)-Cd(1)-O(5)                | 80.50(13)    | O(2)-C(4)-C(1)                | 118.1(4)     |
| O(6)-Cd(1)-O(7)                | 86.81(12)    | O(3 <sup>2</sup> )-C(5)-C(2)  | 116.8(4)     |
| O(7)-Cd(1)-O(5)                | 100.12(15)   | O(4)-C(5)-O(3 <sup>2</sup> )  | 123.8(4)     |
| Cd(1)-O(1)-Cd(1 <sup>1</sup> ) | 106.06(12)   | O(4)-C(5)-C(2)                | 119.4(4)     |

Symmetry transformation <sup>1</sup>-X,1-Y,-Z; <sup>2</sup>-1-X,1-Y,-Z; <sup>3</sup>-X,1-Y,1-Z

Scherrer equation:

$$\text{Eq.} \quad D = \frac{k\lambda}{\beta \cos \theta} \quad (\text{S1})$$

Where  $D$  is the crystallite size in nm,  $K$  is the shape constant (0.9),  $\lambda$  is the wavelength of Cu  $K\alpha$  radiation (1.5406 Å),  $\beta$  is full width at half maximum and  $\theta$  is the diffraction angle ( $^\circ$ )<sup>34</sup>.

The energy gap ( $E_g$ ) was calculated by using Kubelka–Munk function.

$$\text{Eq.} \quad F(R_\infty) = \frac{(1 - R_\infty)^2}{2R_\infty} \quad (\text{S2})$$

$$E(\text{eV}) = \frac{hC}{\lambda} \quad (\text{S3})$$

Where  $R_\infty$  is the diffused reflectance of at the given wavelength, where  $h$  is the Planck's constant ( $6.626 \times 10^{-34}$  J s),  $C$  is the speed of light ( $3.0 \times 10^8$  ms<sup>-1</sup>) and  $\lambda$  is the wavelength<sup>49,50</sup>.

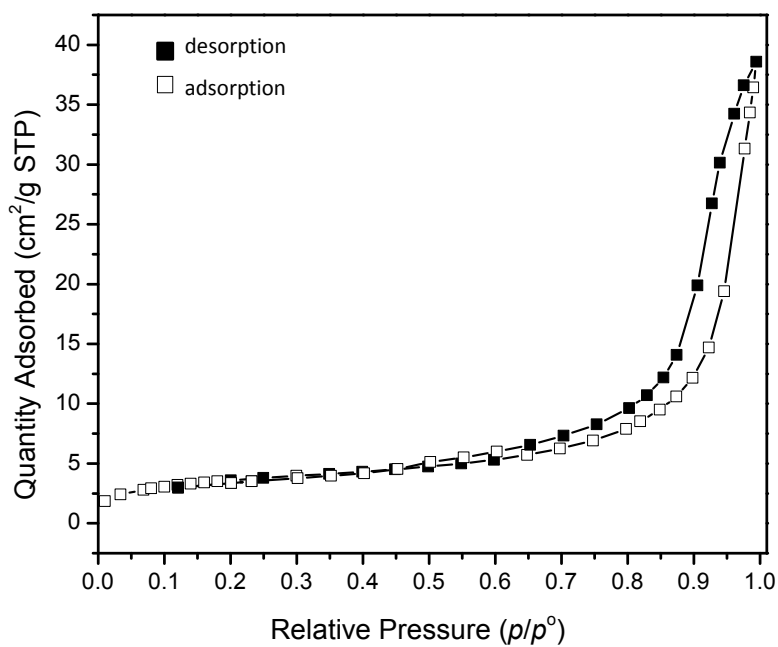

**Fig. S1** The  $\text{N}_2$  adsorption-desorption isotherms of pure Cd-MOF

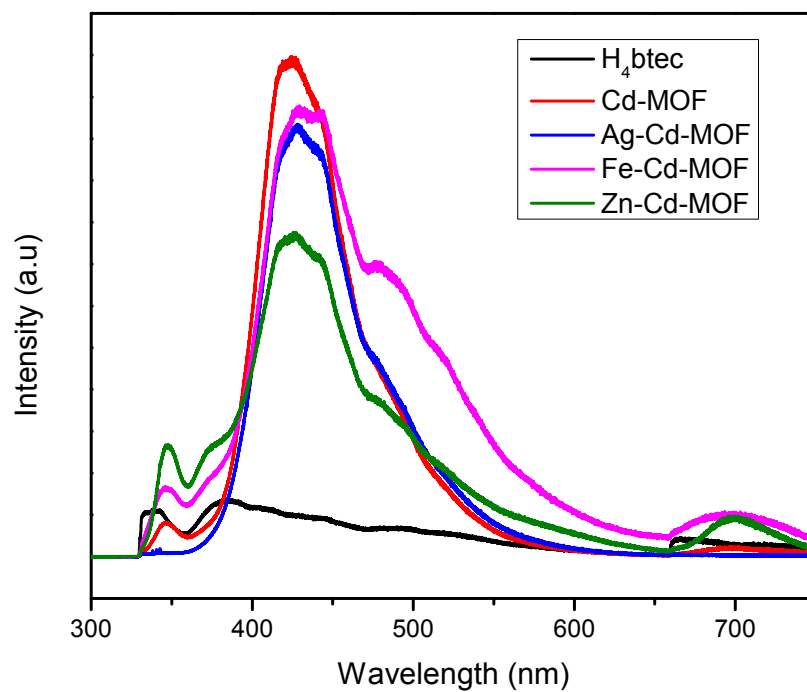

**Fig. S2** Photoluminescence spectra of free H<sub>4</sub>btec linker, complex Cd-MOF, metal ions intercalated Cd-MOF at room temperature ( $\lambda_{ex}=325\text{nm}$ )

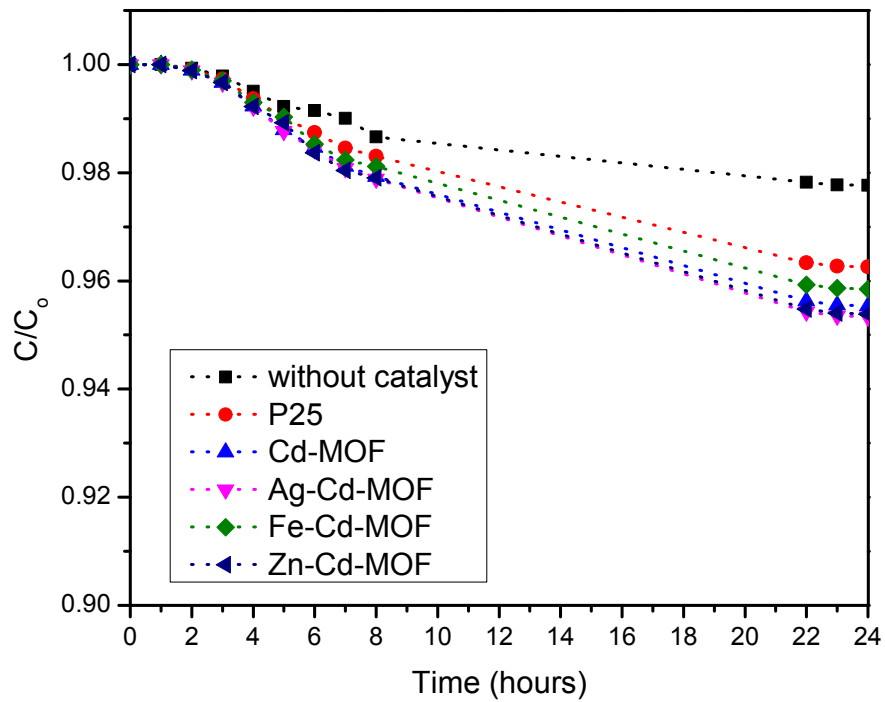

**Fig. S3** Adsorption performance of the studied MOFs under dark condition

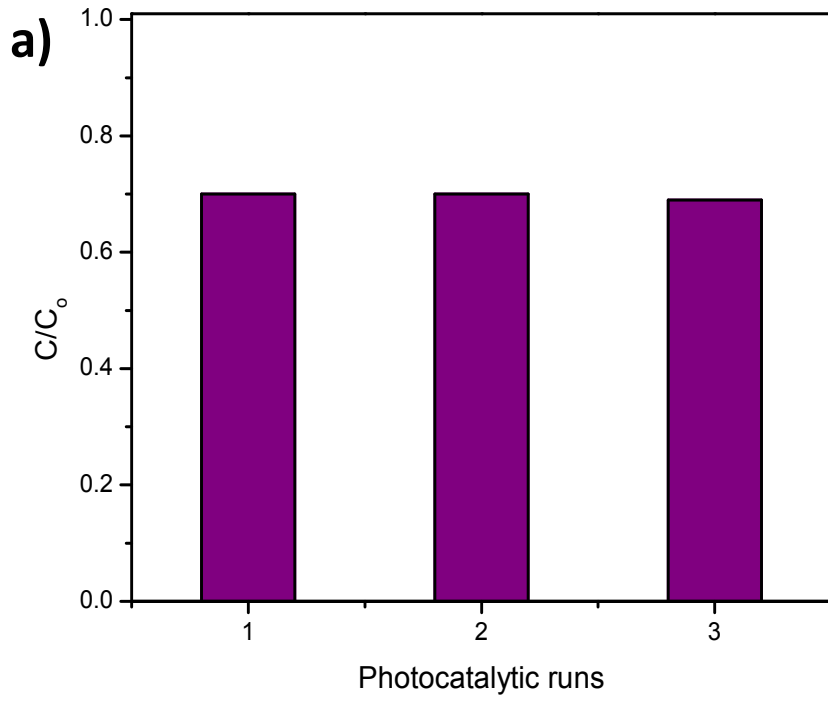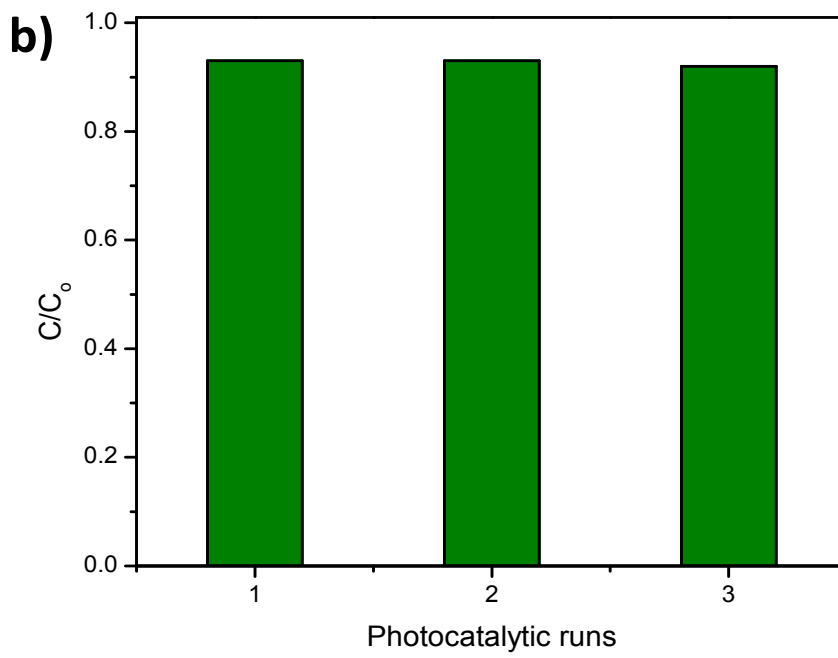

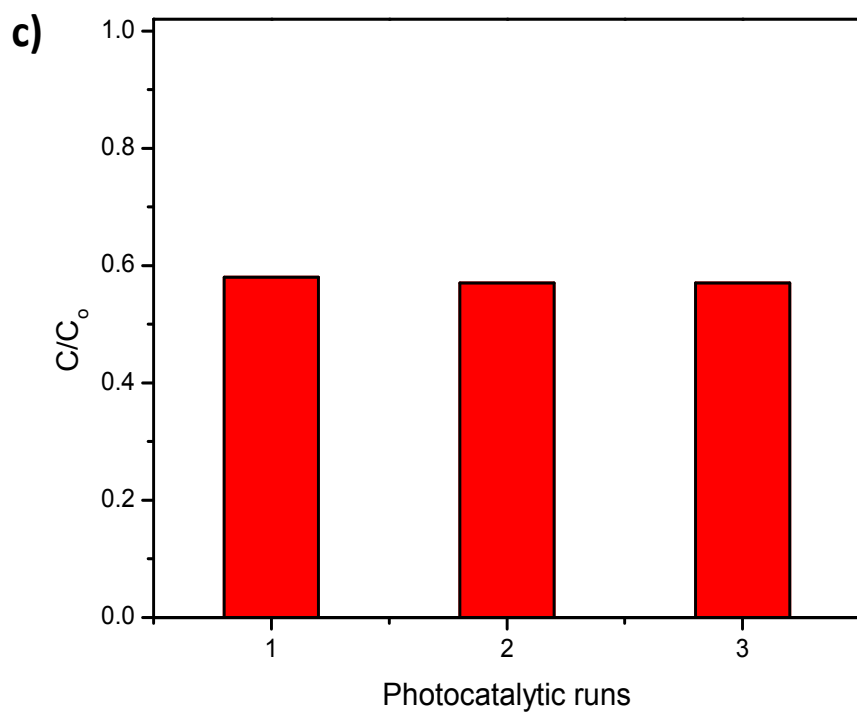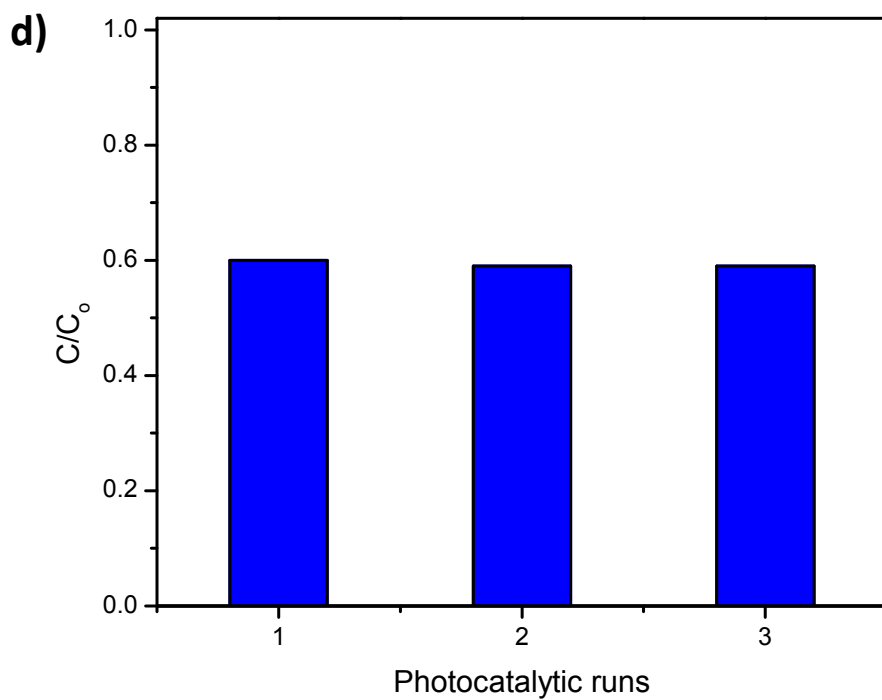

**Fig. S4** Reusability study (a) Cd-MOF and (b) Fe-Cd-MOF (c) Ag-Cd-MOF (d) Zn-Cd-MOF on 2-CP degradation



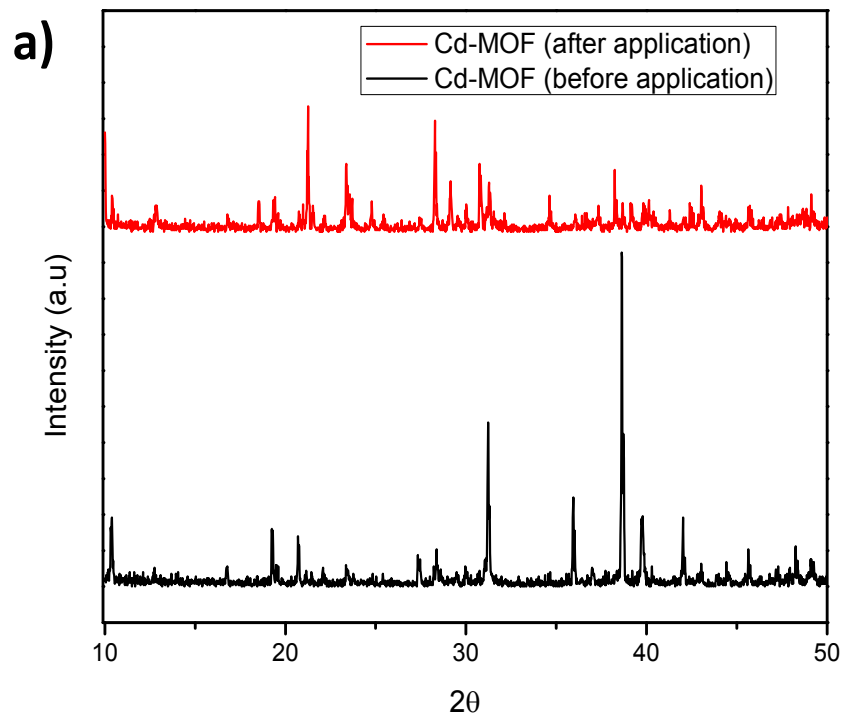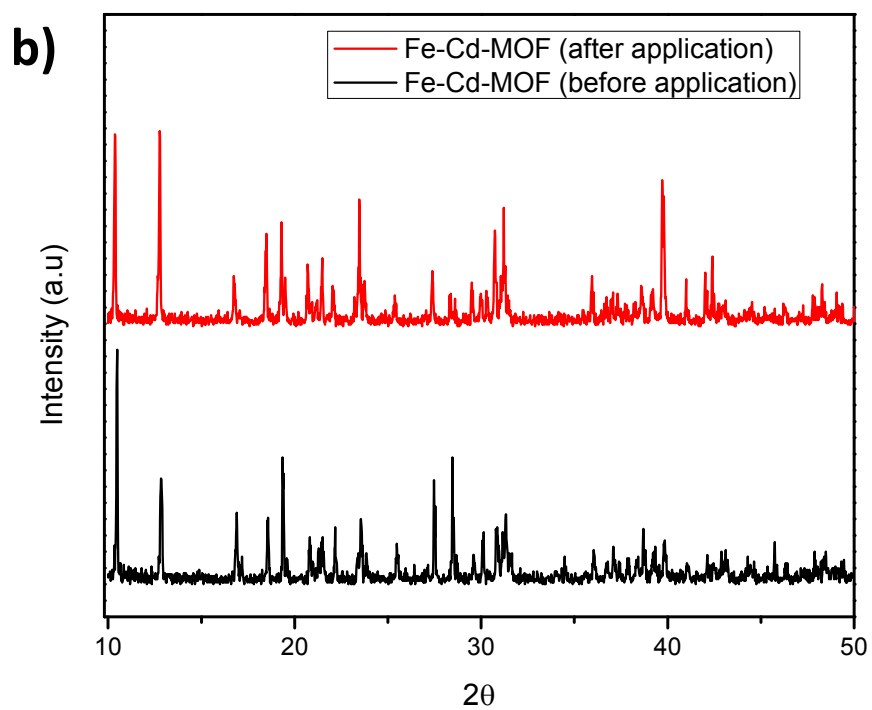

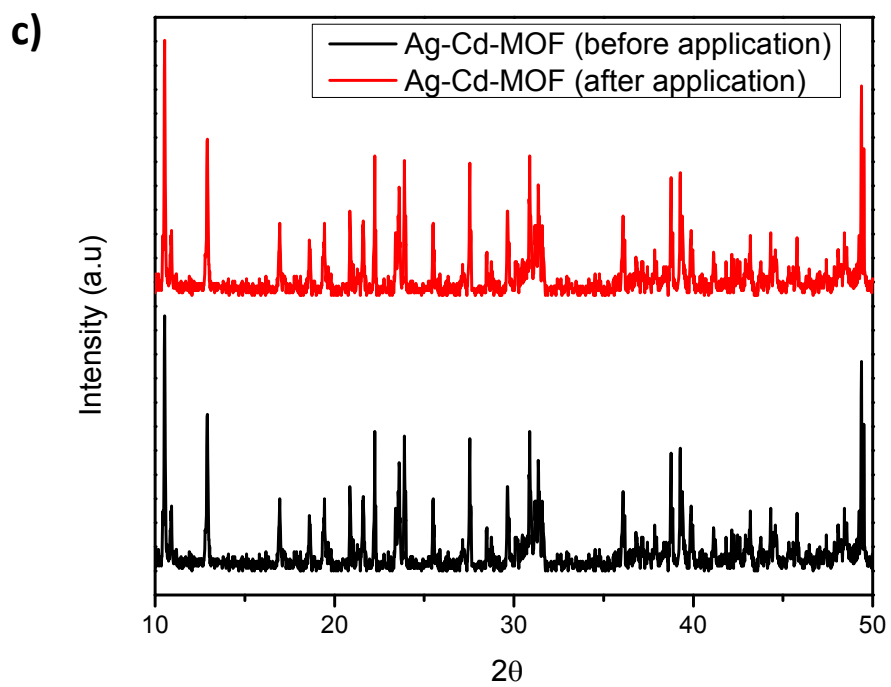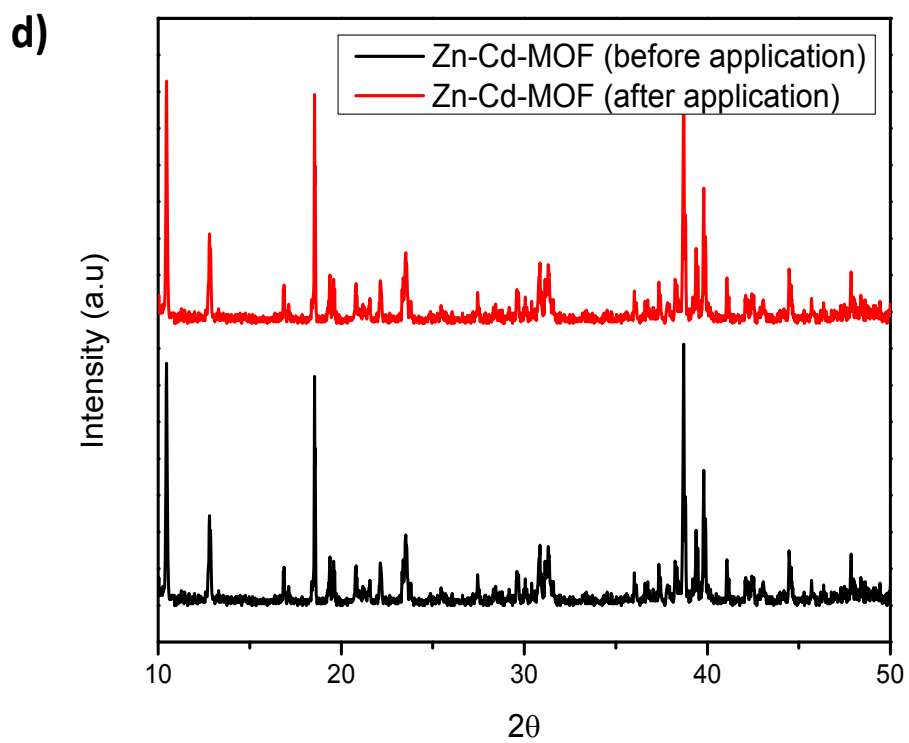

Fig. S5 Diffraction obtained before and after day light photocatalysis application

Eq. 
$$\ln \frac{C}{C_0} = -kt \tag{S4}$$

Wherein  $C_0$  is the initial 2-CP concentration,  $C$  is the 2-CP concentration at a certain time,  $t$  is the reaction time, and  $k$  is the kinetic rate constant. The values of  $k$  can be calculated from the slope and the intercept of the linear plot<sup>9</sup>.

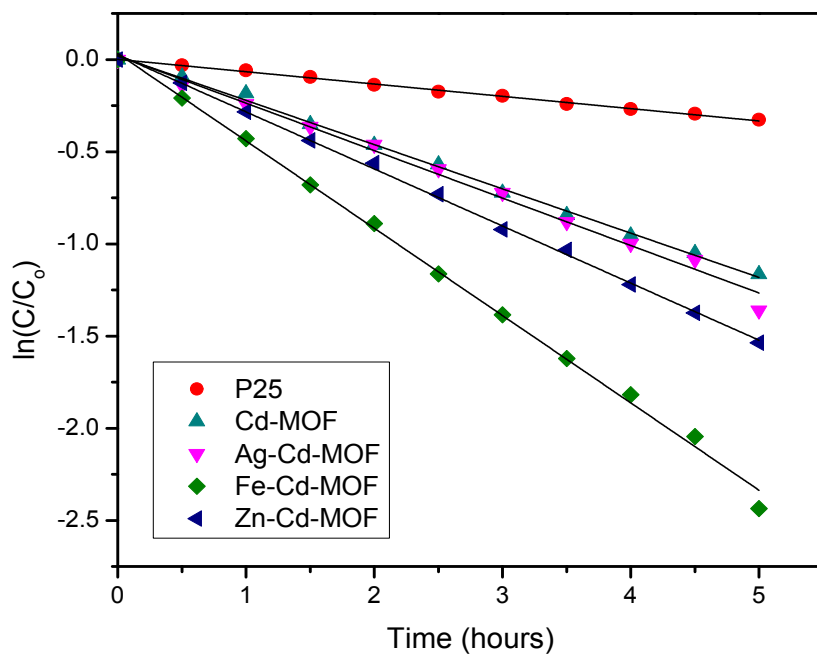

**Fig. S6** The kinetics of 2-CP photodegradation under solar light irradiation
